# Supplementary material
Source: publisher site journal article supplement (http://www.spandidos-publications.com/147/downloadSupplementary)

Figure S1. Effects of Hy and VPA on the gene expressions of VEGI, DR3 and DcR3 on time-point selections in OS cells. U-2 OS cells were treated with 20  $\mu$ M Hy and/or 1.0 mM VPA for 12, 24 or 48 h. (A) VEGI mRNAs, (B) mRNAs and (C) DcR3 mRNAs were quantitated using qPCR. The values are expressed as the ratio to the average value in the no treat as a control. Each bar indicates the mean  $\pm$  SE of values from four independent experiments of each samples, in three sets of condition cultures. \* $P$ <0.01, significant difference in comparison to no treat and to Hy; \*\* $P$ <0.05, significant difference in comparison to Hy. Hy, hydralazine; VPA, sodium valproate; VEGI, vascular endothelial growth inhibitor; OS, osteosarcoma; DR3, death receptor-3; DcR3, decoy receptor-3; qPCR, quantitative polymerase chain reaction; SE, standard error.

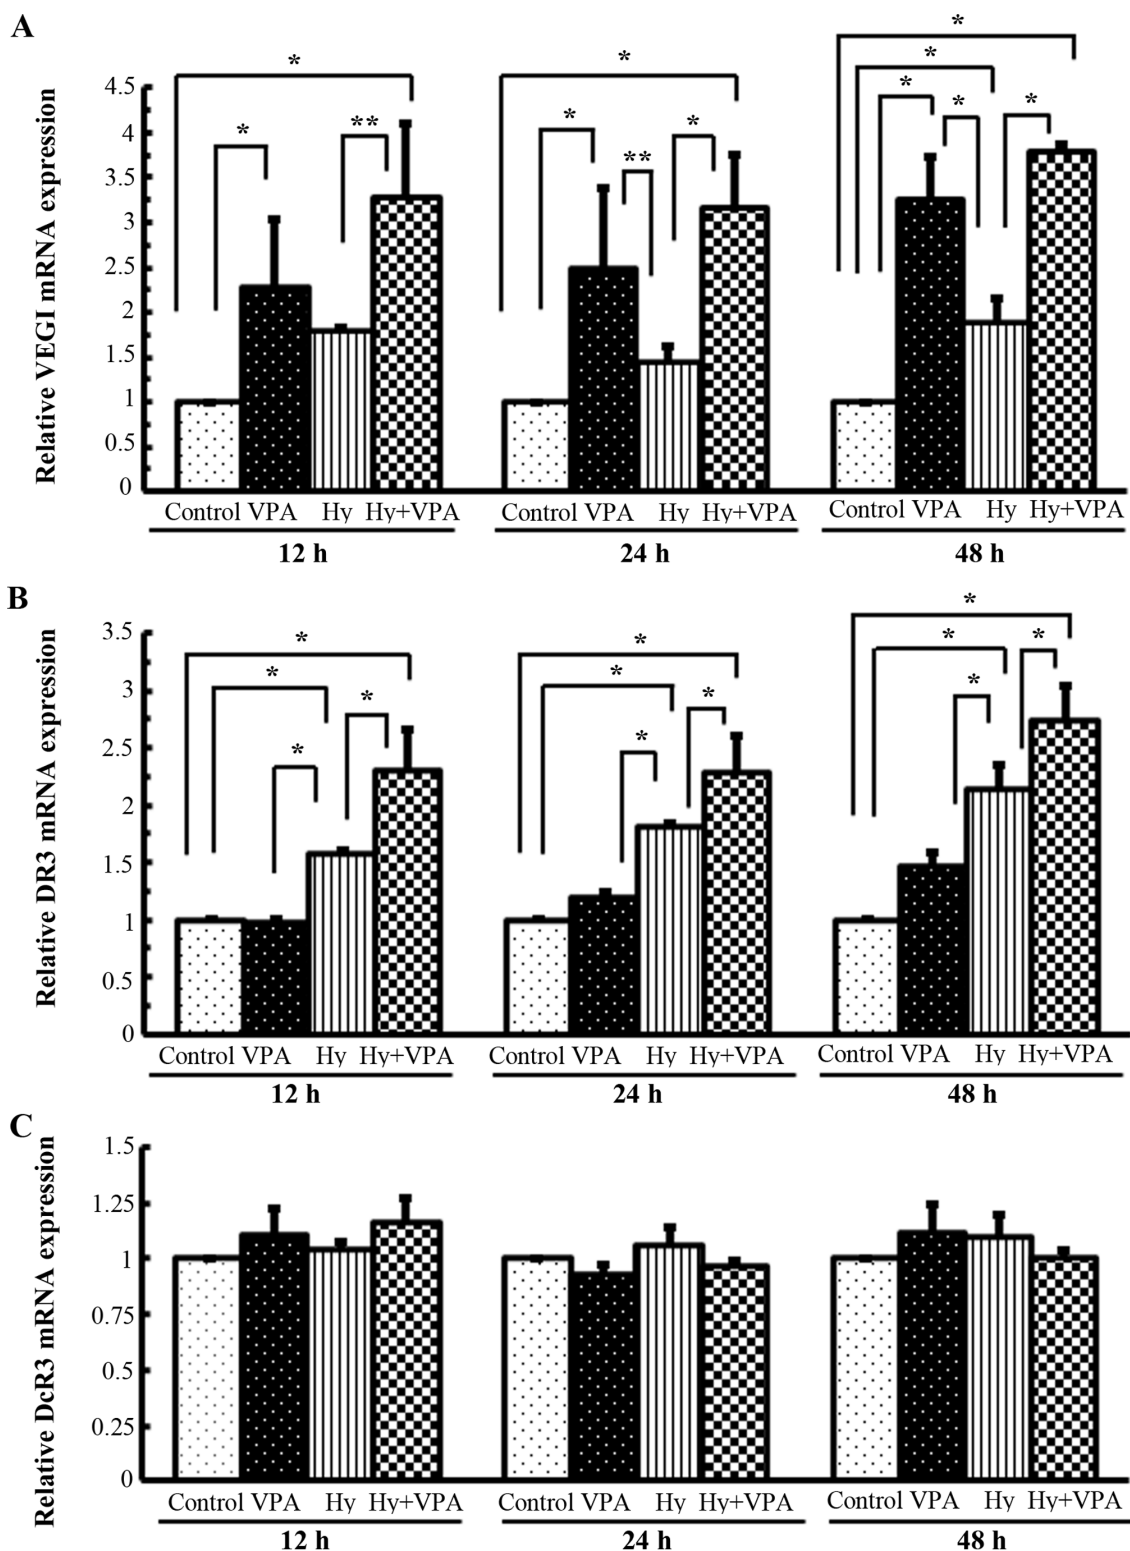

Supplement: Supplementary file 1 [file downloadSupplementary]
